# Supplementary material for: γ-MYN: a new algorithm for estimating Ka and Ks with consideration of variable substitution rates
Source: PubMed Central journal article supplement (PMC2702329; doi:10.1186/1745-6150-4-20), 2009-06-16
Supplement: 1745-6150-4-20-S1.pdf [file 1745-6150-4-20-S1.pdf]

Additional file 1

## **$\gamma$ -MYN: a new algorithm for estimating Ka and Ks with consideration of variable substitution rates**

Da-Peng Wang<sup>\*,1,2</sup>, Hao-Lei Wan<sup>\*,1,2</sup>, Song Zhang<sup>\*,1,2,3</sup>, and Jun Yu<sup>§1,3</sup>

<sup>1</sup>CAS Key Laboratory of Genome Sciences and Information, Beijing Institute of Genomics, Chinese Academy of Sciences, Beijing 100029, China

<sup>2</sup>Graduate University of Chinese Academy of Sciences, Beijing 100039, China

<sup>3</sup>Institute of Computing Technology, Chinese Academy of Sciences, Beijing 100080, China

\*These authors contributed equally to this work.

§Corresponding author

**Table S2 – Standard deviations of  $\omega$  in Figure 1 (Estimated  $\omega$  based on YN, MYN, and  $\gamma$ -MYN).**

| Codon<br>Frequencies          | Method<br>$K_R \setminus$ | $\omega=0.3$ |        |               | $\omega=1$  |        |               | $\omega=3$  |        |               |
|-------------------------------|---------------------------|--------------|--------|---------------|-------------|--------|---------------|-------------|--------|---------------|
|                               |                           | $\alpha=3.3$ |        |               | $\alpha=20$ |        |               | $\alpha=20$ |        |               |
|                               |                           | YN           | MYN    | $\gamma$ -MYN | YN          | MYN    | $\gamma$ -MYN | YN          | MYN    | $\gamma$ -MYN |
| Equal<br>Codon<br>Frequencies | 1                         | 0.0753       | 0.0864 | 0.0866        | 0.2653      | 0.3007 | 0.3018        | 1.4545      | 1.6520 | 1.6587        |
|                               | 2                         | 0.0770       | 0.0837 | 0.0839        | 0.2854      | 0.3081 | 0.3092        | 1.5206      | 1.6288 | 1.6352        |
|                               | 3                         | 0.0785       | 0.0826 | 0.0829        | 0.3001      | 0.3136 | 0.3147        | 1.5197      | 1.5623 | 1.5682        |
|                               | 4                         | 0.0785       | 0.0806 | 0.0808        | 0.3128      | 0.3166 | 0.3176        | 1.5756      | 1.5755 | 1.5815        |
|                               | 5                         | 0.0806       | 0.0805 | 0.0807        | 0.3118      | 0.3099 | 0.3109        | 1.7287      | 1.7055 | 1.7115        |
|                               | 6                         | 0.0805       | 0.0788 | 0.0790        | 0.3024      | 0.2954 | 0.2964        | 1.8146      | 1.7678 | 1.7741        |
|                               | 7                         | 0.0801       | 0.0772 | 0.0775        | 0.3151      | 0.3006 | 0.3016        | 1.6249      | 1.5335 | 1.5394        |
|                               | 8                         | 0.0828       | 0.0786 | 0.0788        | 0.3165      | 0.2985 | 0.2994        | 1.6900      | 1.5795 | 1.5855        |
|                               | 9                         | 0.0853       | 0.0799 | 0.0801        | 0.3228      | 0.2986 | 0.2996        | 1.5386      | 1.4023 | 1.4075        |
|                               | 10                        | 0.0850       | 0.0785 | 0.0788        | 0.3186      | 0.2910 | 0.2919        | 1.6125      | 1.4605 | 1.4658        |
| Human<br>Codon<br>Frequencies | 1                         | 0.0706       | 0.0880 | 0.0885        | 0.2658      | 0.3134 | 0.3146        | 1.6489      | 1.9978 | 2.0051        |
|                               | 2                         | 0.0743       | 0.0849 | 0.0855        | 0.2834      | 0.3162 | 0.3173        | 1.6793      | 1.7934 | 1.7993        |
|                               | 3                         | 0.0761       | 0.0822 | 0.0826        | 0.3003      | 0.3168 | 0.3179        | 1.6326      | 1.6469 | 1.6524        |
|                               | 4                         | 0.0777       | 0.0799 | 0.0803        | 0.3143      | 0.3171 | 0.3181        | 1.8438      | 1.8056 | 1.8124        |
|                               | 5                         | 0.0798       | 0.0792 | 0.0796        | 0.3053      | 0.2964 | 0.2974        | 1.8528      | 1.7420 | 1.7475        |
|                               | 6                         | 0.0825       | 0.0793 | 0.0796        | 0.3271      | 0.3091 | 0.3101        | 1.9010      | 1.7506 | 1.7560        |
|                               | 7                         | 0.0852       | 0.0799 | 0.0802        | 0.3363      | 0.3107 | 0.3116        | 1.7862      | 1.6028 | 1.6081        |
|                               | 8                         | 0.0867       | 0.0803 | 0.0807        | 0.3550      | 0.3234 | 0.3244        | 1.6793      | 1.4760 | 1.4811        |
|                               | 9                         | 0.0886       | 0.0802 | 0.0806        | 0.3588      | 0.3215 | 0.3225        | 1.9581      | 1.6644 | 1.6702        |
|                               | 10                        | 0.0900       | 0.0803 | 0.0808        | 0.3415      | 0.3005 | 0.3015        | 1.7863      | 1.5346 | 1.5399        |
| Rice<br>Codon<br>Frequencies  | 1                         | 0.0667       | 0.0834 | 0.0836        | 0.2578      | 0.3143 | 0.3155        | 1.4073      | 1.6538 | 1.6601        |
|                               | 2                         | 0.0693       | 0.0800 | 0.0802        | 0.2841      | 0.3222 | 0.3233        | 1.5445      | 1.6856 | 1.6916        |
|                               | 3                         | 0.0742       | 0.0808 | 0.0810        | 0.3080      | 0.3279 | 0.3290        | 1.8412      | 1.9363 | 1.9427        |
|                               | 4                         | 0.0748       | 0.0783 | 0.0785        | 0.3030      | 0.3114 | 0.3124        | 1.6986      | 1.6968 | 1.7029        |
|                               | 5                         | 0.0767       | 0.0769 | 0.0771        | 0.3195      | 0.3188 | 0.3198        | 1.8242      | 1.7644 | 1.7698        |
|                               | 6                         | 0.0800       | 0.0778 | 0.0780        | 0.3097      | 0.2981 | 0.2991        | 2.0635      | 1.9281 | 1.9340        |
|                               | 7                         | 0.0825       | 0.0779 | 0.0781        | 0.3231      | 0.3021 | 0.3030        | 1.7558      | 1.6116 | 1.6167        |
|                               | 8                         | 0.0846       | 0.0773 | 0.0775        | 0.3388      | 0.3082 | 0.3091        | 2.2187      | 1.9844 | 1.9905        |
|                               | 9                         | 0.0872       | 0.0783 | 0.0786        | 0.3471      | 0.3090 | 0.3100        | 2.0236      | 1.7541 | 1.7596        |
|                               | 10                        | 0.0880       | 0.0776 | 0.0779        | 0.3916      | 0.3398 | 0.3407        | 2.2779      | 1.9314 | 1.9372        |

**Table S3 - Standard deviations of  $\omega$  in Figure 2 (Estimated  $\omega$  when  $\kappa_Y = 3.75$  and  $\kappa_R$  varies from 1 to 10 under negative selection).**

| $\omega/\alpha$              | Method        | $\kappa_R$ |        |        |        |        |        |        |        |        |        |
|------------------------------|---------------|------------|--------|--------|--------|--------|--------|--------|--------|--------|--------|
|                              |               | 1          | 2      | 3      | 4      | 5      | 6      | 7      | 8      | 9      | 10     |
| $\omega=0.1$<br>$\alpha=4.8$ | YN            | 0.0287     | 0.0304 | 0.0315 | 0.0325 | 0.0335 | 0.0342 | 0.0356 | 0.0360 | 0.0365 | 0.0379 |
|                              | MYN           | 0.0352     | 0.0346 | 0.0339 | 0.0333 | 0.0330 | 0.0326 | 0.0333 | 0.0331 | 0.0330 | 0.0336 |
|                              | $\gamma$ -MYN | 0.0348     | 0.0343 | 0.0336 | 0.0329 | 0.0327 | 0.0323 | 0.0329 | 0.0327 | 0.0327 | 0.0333 |
| $\omega=0.2$<br>$\alpha=4$   | YN            | 0.0501     | 0.0491 | 0.0513 | 0.0543 | 0.0566 | 0.0583 | 0.0587 | 0.0602 | 0.0620 | 0.0639 |
|                              | MYN           | 0.0625     | 0.0564 | 0.0554 | 0.0560 | 0.0565 | 0.0561 | 0.0552 | 0.0559 | 0.0562 | 0.0570 |
|                              | $\gamma$ -MYN | 0.0624     | 0.0563 | 0.0553 | 0.0558 | 0.0564 | 0.0560 | 0.0550 | 0.0557 | 0.0561 | 0.0568 |
| $\omega=0.3$<br>$\alpha=3.3$ | YN            | 0.0706     | 0.0743 | 0.0761 | 0.0777 | 0.0798 | 0.0825 | 0.0852 | 0.0867 | 0.0886 | 0.0900 |
|                              | MYN           | 0.0880     | 0.0849 | 0.0822 | 0.0799 | 0.0792 | 0.0793 | 0.0799 | 0.0803 | 0.0802 | 0.0803 |
|                              | $\gamma$ -MYN | 0.0885     | 0.0855 | 0.0826 | 0.0803 | 0.0796 | 0.0796 | 0.0802 | 0.0807 | 0.0806 | 0.0808 |
| $\omega=0.4$<br>$\alpha=3$   | YN            | 0.0937     | 0.0970 | 0.1005 | 0.1069 | 0.1083 | 0.1125 | 0.1159 | 0.1197 | 0.1228 | 0.1218 |
|                              | MYN           | 0.1149     | 0.1100 | 0.1083 | 0.1103 | 0.1074 | 0.1081 | 0.1078 | 0.1102 | 0.1099 | 0.1082 |
|                              | $\gamma$ -MYN | 0.1163     | 0.1113 | 0.1096 | 0.1116 | 0.1085 | 0.1092 | 0.1089 | 0.1112 | 0.1109 | 0.1092 |
| $\omega=0.5$<br>$\alpha=2.5$ | YN            | 0.1166     | 0.1223 | 0.1278 | 0.1339 | 0.1419 | 0.1464 | 0.1443 | 0.1471 | 0.1518 | 0.1541 |
|                              | MYN           | 0.1430     | 0.1387 | 0.1377 | 0.1374 | 0.1396 | 0.1402 | 0.1345 | 0.1342 | 0.1365 | 0.1359 |
|                              | $\gamma$ -MYN | 0.1459     | 0.1413 | 0.1401 | 0.1399 | 0.1419 | 0.1424 | 0.1365 | 0.1363 | 0.1387 | 0.1379 |
| $\omega=0.6$<br>$\alpha=2$   | YN            | 0.1496     | 0.1522 | 0.1585 | 0.1635 | 0.1724 | 0.1767 | 0.1825 | 0.1814 | 0.1828 | 0.1869 |
|                              | MYN           | 0.1817     | 0.1716 | 0.1684 | 0.1661 | 0.1702 | 0.1689 | 0.1702 | 0.1651 | 0.1626 | 0.1648 |
|                              | $\gamma$ -MYN | 0.1873     | 0.1763 | 0.1727 | 0.1703 | 0.1744 | 0.1730 | 0.1743 | 0.1691 | 0.1665 | 0.1688 |
| $\omega=0.7$<br>$\alpha=1.5$ | YN            | 0.1754     | 0.1769 | 0.1916 | 0.1996 | 0.2071 | 0.2112 | 0.2184 | 0.2161 | 0.2161 | 0.2153 |
|                              | MYN           | 0.2108     | 0.1983 | 0.2035 | 0.2012 | 0.2022 | 0.2015 | 0.2045 | 0.1967 | 0.1926 | 0.1881 |
|                              | $\gamma$ -MYN | 0.2204     | 0.2063 | 0.2114 | 0.2087 | 0.2097 | 0.2090 | 0.2121 | 0.2040 | 0.1997 | 0.1950 |
| $\omega=0.8$<br>$\alpha=1.5$ | YN            | 0.2002     | 0.2143 | 0.2303 | 0.2390 | 0.2455 | 0.2452 | 0.2519 | 0.2607 | 0.2536 | 0.2621 |
|                              | MYN           | 0.2389     | 0.2389 | 0.2434 | 0.2408 | 0.2390 | 0.2327 | 0.2354 | 0.2371 | 0.2263 | 0.2286 |
|                              | $\gamma$ -MYN | 0.2502     | 0.2492 | 0.2535 | 0.2503 | 0.2483 | 0.2419 | 0.2446 | 0.2463 | 0.2353 | 0.2376 |
| $\omega=0.9$<br>$\alpha=1.5$ | YN            | 0.2325     | 0.2500 | 0.2605 | 0.2733 | 0.2739 | 0.2797 | 0.2911 | 0.3056 | 0.3080 | 0.2967 |
|                              | MYN           | 0.2755     | 0.2793 | 0.2776 | 0.2764 | 0.2662 | 0.2661 | 0.2698 | 0.2784 | 0.2748 | 0.2594 |
|                              | $\gamma$ -MYN | 0.2894     | 0.2923 | 0.2898 | 0.2880 | 0.2776 | 0.2775 | 0.2809 | 0.2898 | 0.2860 | 0.2701 |

**Table S4 - Standard deviations of  $\omega$  in Figure 4(The effect of  $t$  based on YN, MYN, and  $\gamma$ -MYN).**

| $\omega$     | Method        | $t$    |        |        |        |        |        |        |        |        |        |
|--------------|---------------|--------|--------|--------|--------|--------|--------|--------|--------|--------|--------|
|              |               | 0.1    | 0.2    | 0.3    | 0.4    | 0.5    | 0.6    | 0.7    | 0.8    | 0.9    | 1      |
| $\omega=0.2$ | YN            | 0.2022 | 0.1349 | 0.1021 | 0.0915 | 0.0828 | 0.0770 | 0.0764 | 0.0746 | 0.0732 | 0.0727 |
|              | MYN           | 0.1719 | 0.1084 | 0.0816 | 0.0725 | 0.0648 | 0.0605 | 0.0585 | 0.0573 | 0.0566 | 0.0559 |
|              | $\gamma$ -MYN | 0.1718 | 0.1082 | 0.0814 | 0.0721 | 0.0644 | 0.0601 | 0.0581 | 0.0567 | 0.0561 | 0.0555 |
| $\omega=0.3$ | YN            | 0.3318 | 0.1995 | 0.1669 | 0.1330 | 0.1149 | 0.1129 | 0.1078 | 0.1053 | 0.1022 | 0.1001 |
|              | MYN           | 0.2792 | 0.1597 | 0.1324 | 0.1054 | 0.0903 | 0.0880 | 0.0844 | 0.0827 | 0.0800 | 0.0787 |
|              | $\gamma$ -MYN | 0.2795 | 0.1599 | 0.1327 | 0.1055 | 0.0904 | 0.0880 | 0.0845 | 0.0829 | 0.0803 | 0.0793 |
| $\omega=0.4$ | YN            | 0.4404 | 0.2767 | 0.3006 | 0.1788 | 0.1570 | 0.1453 | 0.1439 | 0.1343 | 0.1327 | 0.1270 |
|              | MYN           | 0.3685 | 0.2245 | 0.2520 | 0.1426 | 0.1246 | 0.1151 | 0.1128 | 0.1065 | 0.1050 | 0.0998 |
|              | $\gamma$ -MYN | 0.3693 | 0.2252 | 0.2533 | 0.1432 | 0.1253 | 0.1158 | 0.1138 | 0.1076 | 0.1064 | 0.1012 |

**Table S5 - Standard deviations of  $\omega$  in Figure 5(The effects of  $\kappa_R$  and  $\kappa_Y$  based on YN, MYN, and  $\gamma$ -MYN).**

| $\omega$     | Method        | $\kappa_R = \kappa_Y$ |        |        |        |        |        |        |        |        |        |
|--------------|---------------|-----------------------|--------|--------|--------|--------|--------|--------|--------|--------|--------|
|              |               | 1                     | 2      | 3      | 4      | 5      | 6      | 7      | 8      | 9      | 10     |
| $\omega=0.2$ | YN            | 0.0561                | 0.0541 | 0.0529 | 0.0536 | 0.0544 | 0.0539 | 0.0544 | 0.0540 | 0.0543 | 0.0539 |
|              | MYN           | 0.0579                | 0.0560 | 0.0551 | 0.0560 | 0.0571 | 0.0569 | 0.0575 | 0.0572 | 0.0574 | 0.0571 |
|              | $\gamma$ -MYN | 0.0581                | 0.0561 | 0.0550 | 0.0559 | 0.0569 | 0.0567 | 0.0572 | 0.0569 | 0.0571 | 0.0567 |
| $\omega=0.3$ | YN            | 0.0826                | 0.0789 | 0.0776 | 0.0760 | 0.0752 | 0.0756 | 0.0766 | 0.0757 | 0.0762 | 0.0763 |
|              | MYN           | 0.0852                | 0.0813 | 0.0804 | 0.0791 | 0.0785 | 0.0790 | 0.0806 | 0.0793 | 0.0797 | 0.0800 |
|              | $\gamma$ -MYN | 0.0857                | 0.0817 | 0.0808 | 0.0793 | 0.0788 | 0.0792 | 0.0807 | 0.0794 | 0.0798 | 0.0801 |

**Table S6 - Standard deviations of S%, Ka, Ks and  $\omega$  in Table 4(Proportions of synonymous sites (S%) and estimates of Ka , Ks and  $\omega$ ).**

| Method                       | $\kappa_R - \kappa_Y > 0.4$ |          |          |          | $\kappa_R - \kappa_Y < -0.4$ |          |          |          | $ \kappa_R - \kappa_Y  \leq 0.4$ |          |          |          |
|------------------------------|-----------------------------|----------|----------|----------|------------------------------|----------|----------|----------|----------------------------------|----------|----------|----------|
|                              | S%                          | Ka       | Ks       | $\omega$ | S%                           | Ka       | Ks       | $\omega$ | S%                               | Ka       | Ks       | $\omega$ |
| <b>human-dog orthologs</b>   |                             |          |          |          |                              |          |          |          |                                  |          |          |          |
| GY                           | 0.000011                    | 0.000035 | 0.002674 | 0.001886 | 0.000360                     | 0.000093 | 0.000486 | 0.000333 | 0.000354                         | 0.000147 | 0.001448 | 0.000191 |
| YN                           | 0.000354                    | 0.000004 | 0.002939 | 0.002824 | 0.000411                     | 0.000105 | 0.000678 | 0.000335 | 0.000530                         | 0.000189 | 0.001811 | 0.000349 |
| MYN                          | 0.000440                    | 0.000010 | 0.003549 | 0.002627 | 0.000455                     | 0.000102 | 0.000593 | 0.000335 | 0.000571                         | 0.000193 | 0.002005 | 0.000406 |
| $\gamma$ -MYN                | 0.000441                    | 0.000003 | 0.004083 | 0.002572 | 0.000462                     | 0.000094 | 0.000746 | 0.000303 | 0.000568                         | 0.000204 | 0.002339 | 0.000397 |
| <b>human-mouse orthologs</b> |                             |          |          |          |                              |          |          |          |                                  |          |          |          |
| GY                           | 0.000036                    | 0.000702 | 0.006937 | 0.000133 | 0.000409                     | 0.001202 | 0.005636 | 0.000278 | 0.000534                         | 0.000843 | 0.021609 | 0.001204 |
| YN                           | 0.000026                    | 0.000665 | 0.001338 | 0.000499 | 0.000487                     | 0.000971 | 0.005337 | 0.000087 | 0.000665                         | 0.000814 | 0.009187 | 0.001210 |
| MYN                          | 0.000023                    | 0.000648 | 0.001245 | 0.000429 | 0.000563                     | 0.000965 | 0.004935 | 0.000100 | 0.000698                         | 0.000813 | 0.001936 | 0.001158 |
| $\gamma$ -MYN                | 0.000020                    | 0.000667 | 0.000265 | 0.000560 | 0.000567                     | 0.000995 | 0.004167 | 0.000237 | 0.000709                         | 0.000852 | 0.001028 | 0.001057 |
| <b>human-chimp orthologs</b> |                             |          |          |          |                              |          |          |          |                                  |          |          |          |
| GY                           | 0.000720                    | 0.000064 | 0.000528 | 0.019020 | 0.000566                     | 0.000118 | 0.000311 | 0.000076 | 0.000552                         | 0.000007 | 0.000030 | 0.001191 |
| YN                           | 0.000899                    | 0.000089 | 0.000517 | 0.020643 | 0.000672                     | 0.000151 | 0.000302 | 0.000113 | 0.000225                         | 0.000276 | 0.000124 | 0.000420 |
| MYN                          | 0.000961                    | 0.000088 | 0.000581 | 0.020185 | 0.000708                     | 0.000156 | 0.000269 | 0.000157 | 0.000234                         | 0.000262 | 0.000126 | 0.000459 |
| $\gamma$ -MYN                | 0.000961                    | 0.000093 | 0.000600 | 0.020277 | 0.000708                     | 0.000171 | 0.000281 | 0.000168 | 0.000234                         | 0.000281 | 0.000144 | 0.000453 |

**Table S7 – Human codon frequencies and rice codon frequencies are listed.**

A.

| human       |             |             |             |
|-------------|-------------|-------------|-------------|
| 0.017409269 | 0.020289522 | 0.007486065 | 0.012938188 |
| 0.014594883 | 0.017283519 | 0.011678701 | 0.004546929 |
| 0.012389283 | 0.01538331  | 0           | 0           |
| 0.01040624  | 0.012300461 | 0           | 0.012483096 |
| 0.013075914 | 0.01937834  | 0.009098848 | 0.040017166 |
| 0.017203679 | 0.019580936 | 0.016632818 | 0.006966103 |
| 0.010930194 | 0.015058957 | 0.012153753 | 0.034648875 |
| 0.004700622 | 0.010643766 | 0.006286459 | 0.011740578 |
| 0.016102875 | 0.020771561 | 0.007198639 | 0.022269572 |
| 0.012899266 | 0.018333425 | 0.014548975 | 0.00597508  |
| 0.017131822 | 0.019294507 | 0.025269587 | 0.033415336 |
| 0.011979102 | 0.019483131 | 0.011901257 | 0.01160884  |
| 0.011028997 | 0.014318435 | 0.007056921 | 0.028037066 |
| 0.018568955 | 0.028328485 | 0.015867345 | 0.007531974 |
| 0.02230051  | 0.025542044 | 0.029791566 | 0.040795613 |
| 0.0107266   | 0.022306499 | 0.016356369 | 0.015953173 |

B.

| rice      |           |            |           |
|-----------|-----------|------------|-----------|
| 0.0133796 | 0.0235996 | 0.00596498 | 0.0144556 |
| 0.0135125 | 0.0173109 | 0.0138465  | 0.0124041 |
| 0.010018  | 0.0161527 | 0          | 0         |
| 0.0060901 | 0.0125415 | 0          | 0.0129919 |
| 0.0160226 | 0.0271046 | 0.0070549  | 0.0227605 |
| 0.0136438 | 0.0117307 | 0.0143695  | 0.016982  |
| 0.0113064 | 0.0133664 | 0.0125183  | 0.0218757 |
| 0.0063044 | 0.0151675 | 0.0050089  | 0.0115529 |
| 0.0146539 | 0.0198529 | 0.0089378  | 0.0249317 |
| 0.0107111 | 0.0145815 | 0.0118241  | 0.0105799 |
| 0.0156193 | 0.018845  | 0.015647   | 0.0335305 |
| 0.0091412 | 0.0166212 | 0.0100826  | 0.0156274 |
| 0.0164041 | 0.0202853 | 0.0068767  | 0.0248971 |
| 0.0203679 | 0.0302987 | 0.01801    | 0.0252536 |
| 0.0257348 | 0.0280494 | 0.0209591  | 0.0381575 |
| 0.0150104 | 0.0286005 | 0.0148437  | 0.0160269 |

Note: 64 codon frequencies are in fixed order TTT, TTC, TTA, TTG, TCT, TCC, ..., GGG, under the F3x4 table.

# Supplementary methods

## A method of determining the optimal $\alpha$ values in each test

To select the optimal parameter “ $\alpha$ ”, we build an **optimal index**.

$$f = \sum_{1 \leq i \leq 10} (C_i^{estimated} - C_i^{expected})^2$$

In this function, the values of  $i$  from 1 to 10 stand for the  $\kappa_R$  values increasing from 1 to 10, fixing  $\kappa_Y = 3.75$ , as used in the analyses.  $C_i^{estimated}$  stands for the estimated values of  $\omega$ , and  $C_i^{expected}$  stands for the expected values of  $\omega$ , when  $\kappa_R = i$ . This function weighs the deviation from true values, regardless if the deviation is positive or negative. To minimize  $f$ , we get the optimal  $a$  under various conditions to force the estimated values to deviate from real values.
