# Supplementary material for: γ-MYN: a new algorithm for estimating Ka and Ks with consideration of variable substitution rates
Source: PubMed Central journal article supplement (PMC2702329; doi:10.1186/1745-6150-4-20), 2009-06-16
Supplement: 1745-6150-4-20-S2.pdf [file 1745-6150-4-20-S2.pdf]

# **$\gamma$ -MYN: a new algorithm for estimating Ka and Ks with consideration of variable substitution rates**

Da-Peng Wang<sup>\*,1,2</sup>, Hao-Lei Wan<sup>\*,1,2</sup>, Song Zhang<sup>\*,1,2,3</sup>, and Jun Yu<sup>§1,3</sup>

<sup>1</sup>CAS Key Laboratory of Genome Sciences and Information, Beijing Institute of Genomics, Chinese Academy of Sciences, Beijing 100029, China

<sup>2</sup>Graduate University of Chinese Academy of Sciences, Beijing 100039, China

<sup>3</sup>Institute of Computing Technology, Chinese Academy of Sciences, Beijing 100080, China

\*These authors contributed equally to this work.

§Corresponding author

## **1. Tamura-Nei Model**

**Table S1 Nucleotide Substitution Models**

| original nucleotide | mutant nucleotide |                |                |                |
|---------------------|-------------------|----------------|----------------|----------------|
|                     | T                 | C              | A              | G              |
| T                   | –                 | $\alpha_2 g_C$ | $\beta g_A$    | $\beta g_G$    |
| C                   | $\alpha_2 g_T$    | –              | $\beta g_A$    | $\beta g_G$    |
| A                   | $\beta g_T$       | $\beta g_C$    | –              | $\alpha_1 g_G$ |
| G                   | $\beta g_T$       | $\beta g_C$    | $\alpha_1 g_A$ | –              |

Note:  $\alpha_1$ , transitional rate between purines;  $\alpha_2$ , transitional rate between pyrimidines;  $\beta$ , transversional rate;

$g_N$ , frequencies of nucleotide N, where  $N \in \{T, C, A, G\}$ .

Under the assumption that the rate of nucleotide substitution  $\lambda$  is the same for all sites considered, Tamura and Nei used  $g_T$ ,  $g_C$ ,  $g_A$  and  $g_G$  to represent nucleotide

frequencies for T,C,A and G, respectively. They defined  $\alpha_1$ ,  $\alpha_2$  and  $\beta$  as transitional rates between purines and between pyrimidines, and transversional rate, respectively. They derived the formulas (S1-S3) for the proportions of transitional differences between purines( $P_1$ ) and between pyrimidines( $P_2$ ) and of transversional differences( $Q$ ) over divergence time t [1, 2]:

$$P_1 = \frac{2g_A g_G}{g_R} \{g_R + g_Y \exp(-2\beta t) - \exp[-2(g_R \alpha_1 + g_Y \beta)t]\} \quad (S1)$$

$$P_2 = \frac{2g_T g_C}{g_Y} \{g_Y + g_R \exp(-2\beta t) - \exp[-2(g_Y \alpha_2 + g_R \beta)t]\} \quad (S2)$$

$$Q = 2g_R g_Y [1 - \exp(-2\beta t)] \quad (S3)$$

where  $g_R = g_A + g_G$  and  $g_Y = g_T + g_C$ .

## 2. Derivation of $\kappa_R$ and $\kappa_Y$

Under the assumption that the rate of nucleotide substitution  $\lambda$  approximately follows the gamma distribution, we derive the equations for estimating  $\kappa_R$  and  $\kappa_Y$ .

We consider Tamura-Nei Model, where the average substitution rate is given by [1]  $\lambda = 2g_A g_G \alpha_1 + 2g_T g_C \alpha_2 + 2g_R g_Y \beta$ , where  $g_R = g_A + g_G$  and  $g_Y = g_T + g_C$ . We assume that  $\lambda$  varies with nucleotide site according to the following gamma distribution [3, 4] :

$$f(\lambda) = \frac{b^\alpha}{\tau(\alpha)} e^{-b\lambda} \lambda^{\alpha-1} \quad (S4)$$

Where  $\alpha = \bar{\lambda}^2 / V(\lambda)$  and  $b = \alpha / \bar{\lambda}$ ,  $\bar{\lambda}$  and  $V(\lambda)$  being, respectively, the mean and variance of  $\lambda$ .  $\tau(\alpha)$  is the gamma function. Here note that  $\alpha$  is the square of the inverse of the coefficient of variation. To avoid using too many parameters, we set  $b = \alpha$  so that the mean of the distribution is 1, with variance  $1/\alpha$ . The shape parameter  $\alpha$  is then inversely related to the extent of rate variation at sites.

Therefore, if  $\lambda$  or  $\alpha_1, \alpha_2$  and  $\beta$  follow the gamma distribution, the means of  $P_1, P_2$  and  $Q$  are given by [1, 3, 4]

$$\bar{P}_1 = \int_0^\infty P_1 f(\lambda) d\lambda = \frac{2g_A g_G}{g_R} \left\{ g_R - \left[ \frac{\alpha}{\alpha + 2(g_R \bar{\alpha}_1 + g_Y \bar{\beta})t} \right]^\alpha + g_Y \left( \frac{\alpha}{\alpha + 2\bar{\beta}t} \right)^\alpha \right\}, \quad (S5)$$

$$\bar{P}_2 = \int_0^\infty P_2 f(\lambda) d\lambda = \frac{2g_T g_C}{g_Y} \left\{ g_Y - \left[ \frac{\alpha}{\alpha + 2(g_Y \bar{\alpha}_2 + g_R \bar{\beta})t} \right]^\alpha + g_R \left( \frac{\alpha}{\alpha + 2\bar{\beta}t} \right)^\alpha \right\}, \quad (S6)$$

$$\bar{Q} = \int_0^\infty Q f(\lambda) d\lambda = 2g_R g_Y \left[ 1 - \left( \frac{\alpha}{\alpha + 2\bar{\beta}t} \right)^\alpha \right] \quad (S7)$$

Where  $\bar{\alpha}_1$ ,  $\bar{\alpha}_2$  and  $\bar{\beta}$  are the means of  $\alpha_1$ ,  $\alpha_2$  and  $\beta$ , respectively.

From (S5), (S6) and (S7) we can get the transformation:

$$2\bar{\alpha}_1 t = \frac{\alpha}{g_R} \left[ \left( 1 - \frac{1}{2g_R} \bar{Q} - \frac{g_R}{2g_A g_G} \bar{P}_1 \right)^{-1/\alpha} - g_Y \left( 1 - \frac{1}{2g_R g_Y} \bar{Q} \right)^{-1/\alpha} - g_R \right], \quad (S8)$$

$$2\bar{\alpha}_2 t = \frac{\alpha}{g_Y} \left[ \left( 1 - \frac{1}{2g_Y} \bar{Q} - \frac{g_Y}{2g_T g_C} \bar{P}_2 \right)^{-1/\alpha} - g_R \left( 1 - \frac{1}{2g_R g_Y} \bar{Q} \right)^{-1/\alpha} - g_Y \right], \quad (S9)$$

$$2\bar{\beta} t = \alpha \left[ \left( 1 - \frac{1}{2g_R g_Y} \bar{Q} \right)^{-1/\alpha} - 1 \right] \quad (S10)$$

In order to conveniently remember the meanings of  $\bar{P}_1$ ,  $\bar{P}_2$  and  $\bar{Q}$ , in our main manuscript we rename them as  $T_R, T_Y, V$ , respectively. Hence, the formulas for estimating  $\kappa_R$ ,  $\kappa_Y$  and  $d$  are as follows.

$$\kappa_R = \bar{\alpha}_1 / \bar{\beta} = \frac{h - g_Y \times j - g_R}{g_R \times j - g_R}, \quad (S11)$$

$$\kappa_Y = \bar{\alpha}_2 / \bar{\beta} = \frac{i - g_R \times j - g_Y}{g_Y \times j - g_Y} \quad (S12)$$

$$\begin{aligned} d &= 4g_A g_G \bar{\alpha}_1 t + 4g_T g_C \bar{\alpha}_2 t + 4g_R g_Y \bar{\beta} t \\ &= 2\alpha \left[ \frac{g_A g_G}{g_R} h + \frac{g_T g_C}{g_Y} i + \left( g_R g_Y - \frac{g_A g_G g_Y}{g_R} - \frac{g_T g_C g_R}{g_Y} \right) j - g_A g_G - g_T g_C - g_R g_Y \right] \end{aligned} \quad (s13)$$

Where

$$h = \left( 1 - \frac{1}{2g_R} V - \frac{g_R}{2g_A g_G} T_R \right)^{-1/\alpha}, \quad (\text{S14})$$

$$i = \left( 1 - \frac{1}{2g_Y} V - \frac{g_Y}{2g_T g_C} T_Y \right)^{-1/\alpha}, \quad (\text{S15})$$

$$j = \left( 1 - \frac{1}{2g_R g_Y} V \right)^{-1/\alpha} \quad (\text{S16})$$

## Reference

1. Tamura K, Nei M: **Estimation of the number of nucleotide substitutions in the control region of mitochondrial DNA in humans and chimpanzees.** *Mol Biol Evol* 1993, **10**:512-526.
2. Zhang Z, Li J, Yu J: **Computing Ka and Ks with a consideration of unequal transitional substitutions.** *BMC Evol Biol* 2006, **6**:44.
3. Jin L, Nei M: **Limitations of the evolutionary parsimony method of phylogenetic analysis.** *Mol Biol Evol* 1990, **7**:82-102.
4. Nei M, Gojobori T: **Simple methods for estimating the numbers of synonymous and nonsynonymous nucleotide substitutions.** *Mol Biol Evol* 1986, **3**:418-426.
